# Supplementary material
Source: MDPI journal article supplement (https://www.mdpi.com/2072-4292/12/11/1859)
Supplement: s1 [file s1]

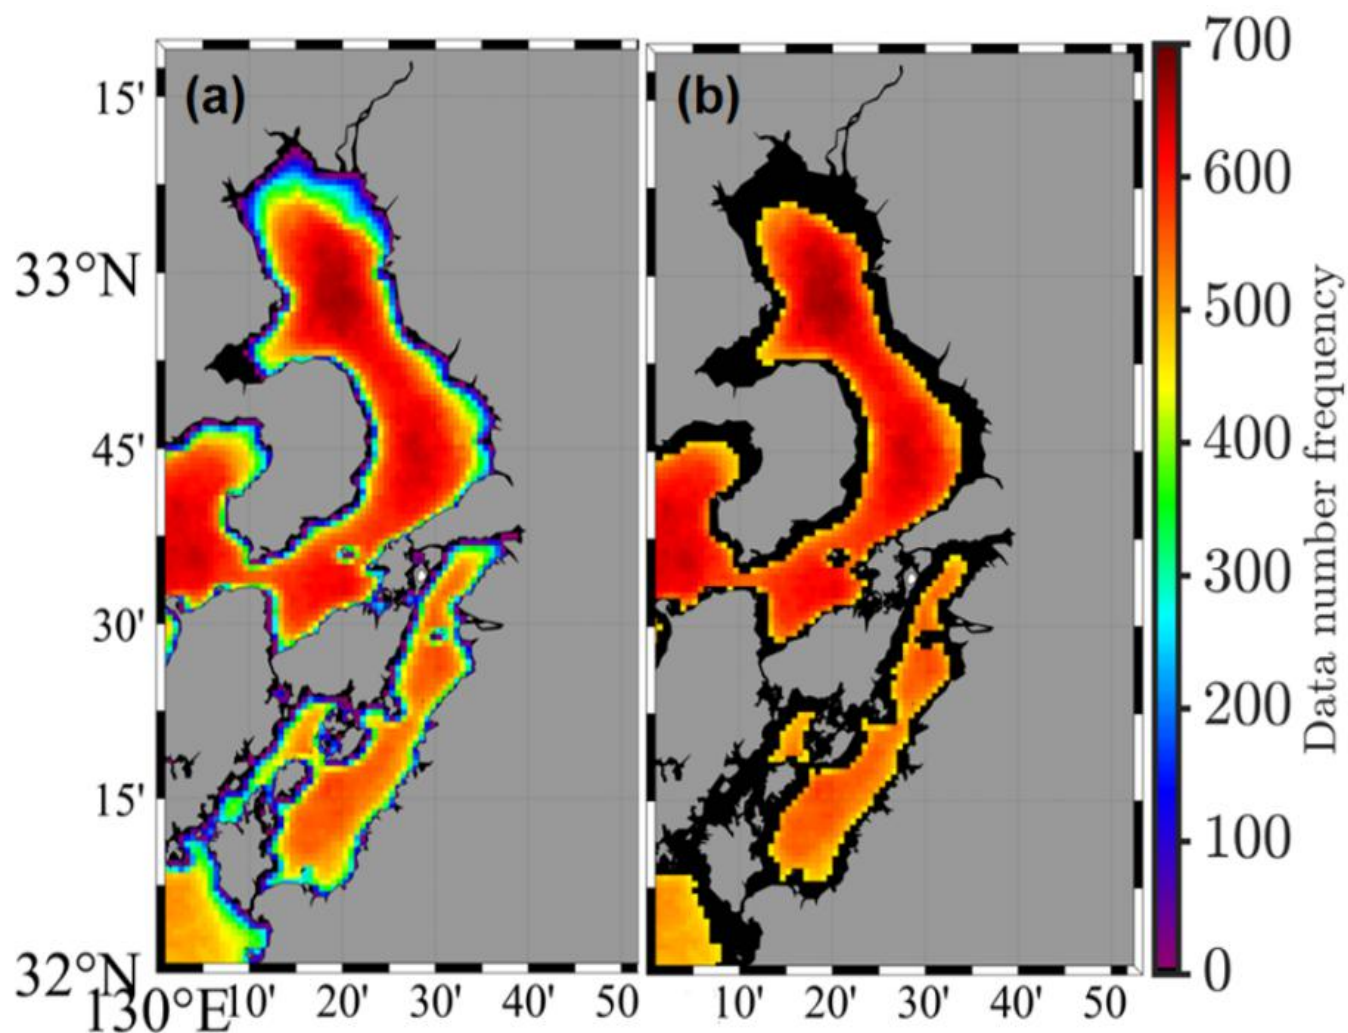

**Figure S1.** Data number frequency without (a) and with (b) masking for Ariake Sea from 2002 to 2017.

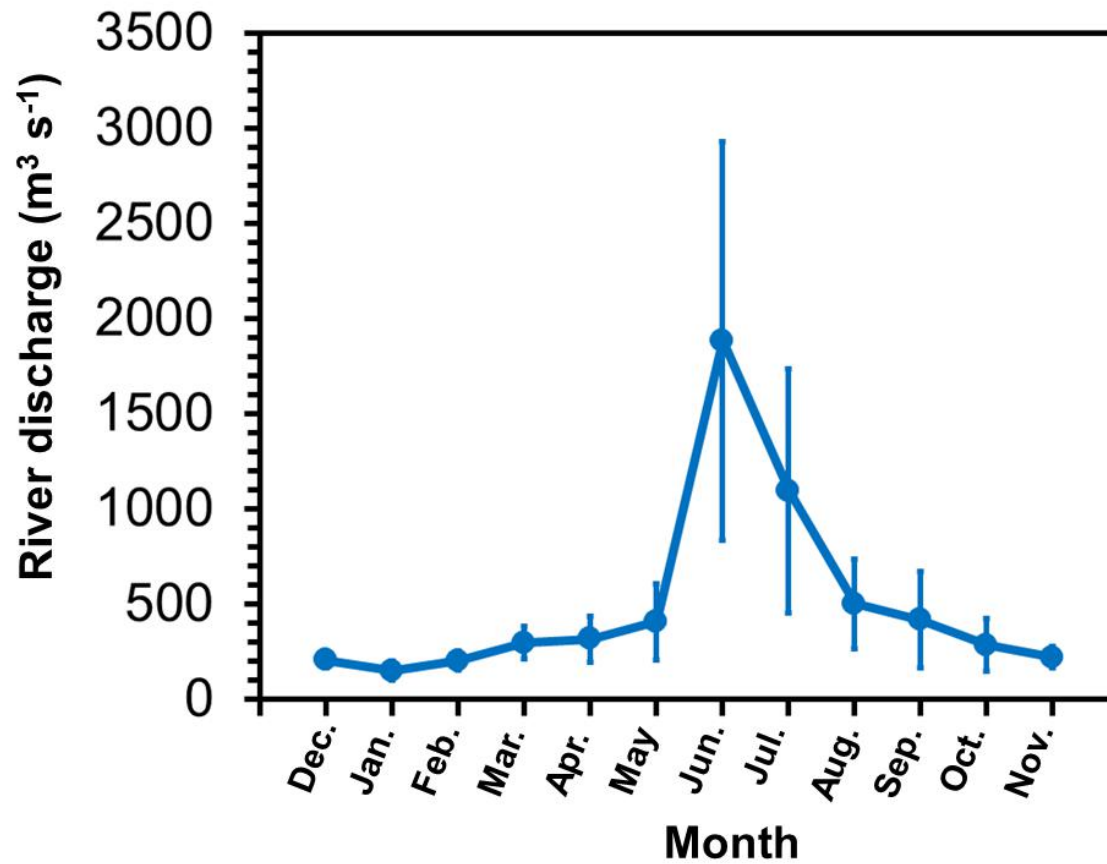

**Figure S2.** Monthly river discharge from the seven main rivers (Figure 1) to the Ariake Sea.

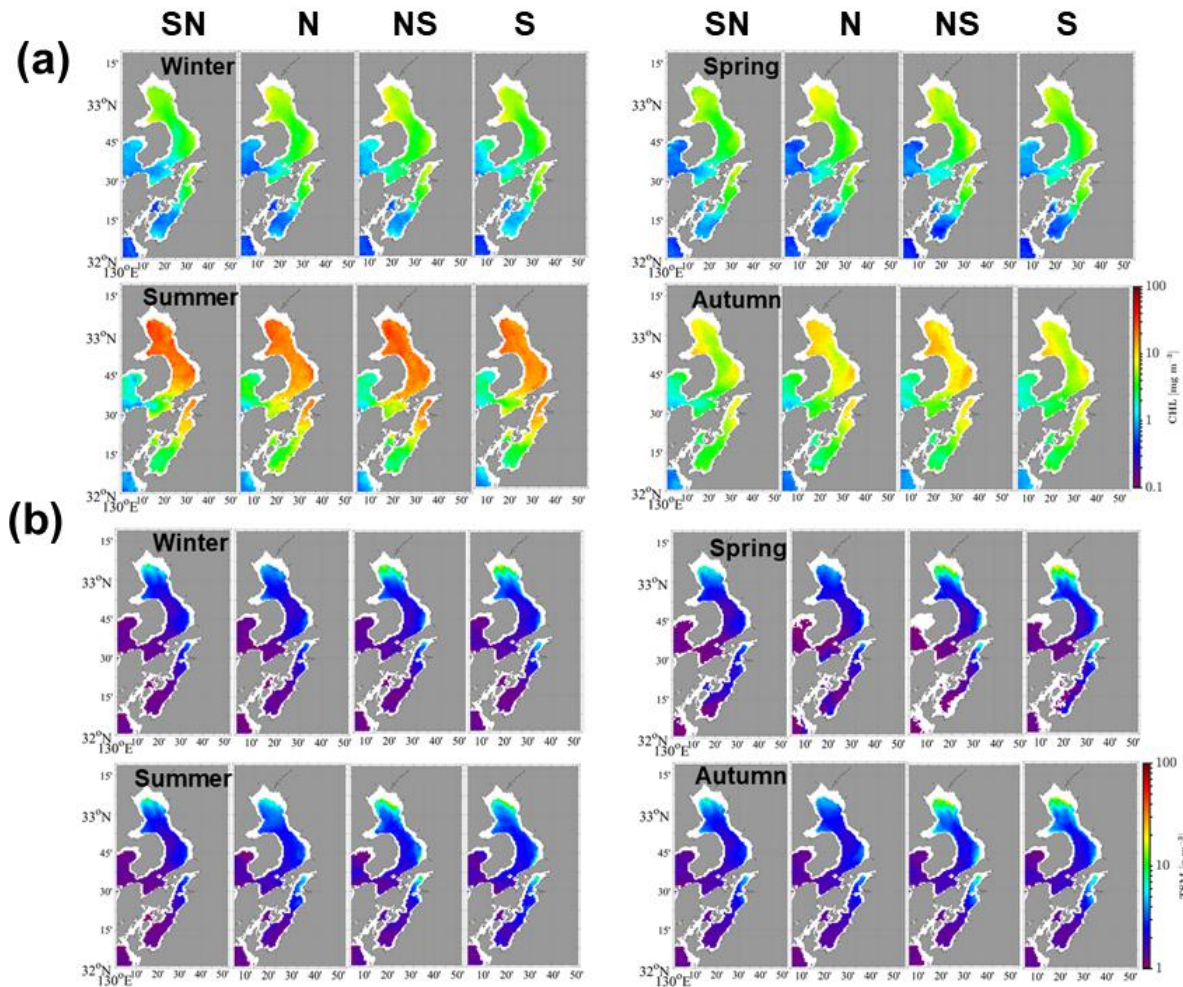

**Figure S3.** Satellite images of seasonal climatology of Chl-a (a) and TSM (b) over the spring-neap tidal cycle.
